# Supplementary material for: Ferroelectric properties in metal-coordinated complex tris(2-hydroxyethyl) ammonium trichloro cadmium(ii)
Source: Royal Society of Chemistry journal article supplement (doi:10.1039/d1tc05195d), 2022-01-01
Supplement: d1tc05195d1.pdf [file d1tc05195d1.pdf]

## Supporting Information

### Ferroelectric Properties in Metal Coordinated Complex Tris(2-Hydroxyethyl) ammonium Trichloro Cadmium(II)

*Zheng Tang<sup>1</sup>, Xiao-Fan Sun<sup>1</sup>, Zhang-Ran Gao<sup>1</sup>, Dong Li<sup>1</sup>, Shu-Lin Jiao<sup>1</sup>, Cui-Ping Xu<sup>1</sup>*

*Zhu Yang<sup>1</sup>, Peng Chen<sup>1</sup>, Yan-Ming Xu<sup>1</sup>, Jinlong Xu<sup>2</sup>, Hong-Ling Cai<sup>1\*</sup> and X. S. Wu<sup>1</sup>*

<sup>1</sup>Collaborative Innovation Center of Advanced Microstructures, Laboratory of Solid State Microstructures & School of Physics, Nanjing University, Nanjing, 210093, People's Republic of China

<sup>2</sup>School of Electronic Science and Engineering, Nanjing University, Nanjing 210093, China

#### **Corresponding Author**

[hlcai@nju.edu.cn](mailto:hlcai@nju.edu.cn);

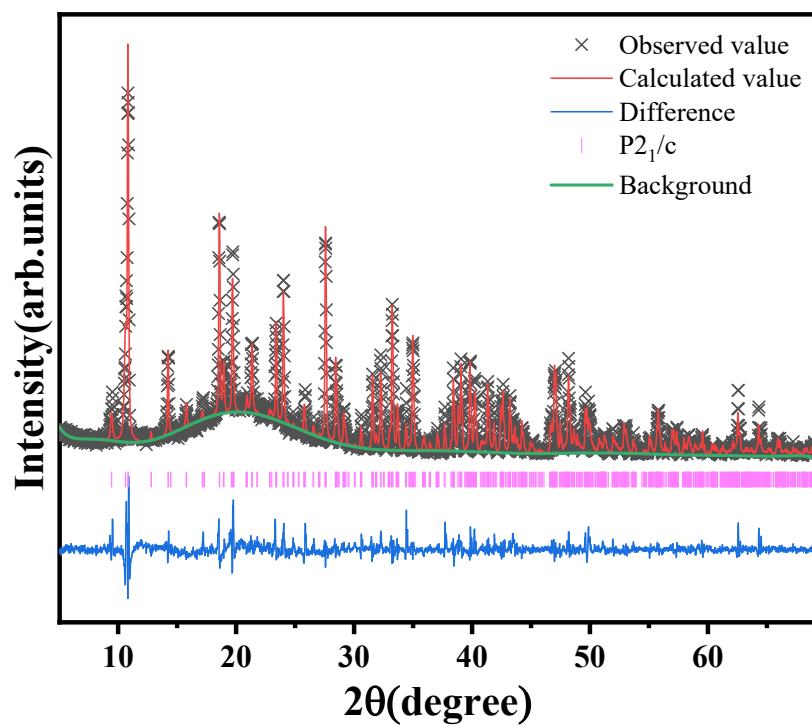

Figure S1. The experimental PXRD patterns and the simulated PXRD patterns of the synthesized sample.

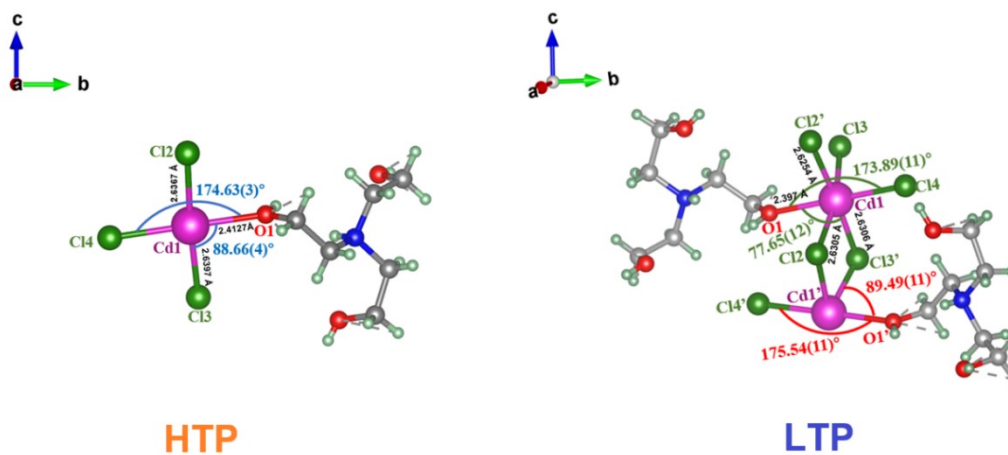

Figure S2. The crystal figures in the asymmetric unit at HTP and LTP.

Table S1. Crystal data and geometry details of compound 1.

|                                 | The LTP                                                                                       | The HTP                                                          |
|---------------------------------|-----------------------------------------------------------------------------------------------|------------------------------------------------------------------|
| Chemical formula                | C <sub>12</sub> H <sub>32</sub> Cd <sub>2</sub> Cl <sub>6</sub> N <sub>2</sub> O <sub>6</sub> | C <sub>6</sub> H <sub>16</sub> CdCl <sub>3</sub> NO <sub>3</sub> |
| M <sub>r</sub>                  | 737.92                                                                                        | 368.96                                                           |
| Space group                     | P2 <sub>1</sub>                                                                               | P2/c                                                             |
| Temperature/K                   | 213 K                                                                                         | 293 K                                                            |
| a(Å)                            | 9.4760(2)                                                                                     | 9.5109(3)                                                        |
| b(Å)                            | 16.5098(4)                                                                                    | 16.5687(6)                                                       |
| c(Å)                            | 7.7069(2)                                                                                     | 7.7219(3)                                                        |
| β                               | 101.6235(10)                                                                                  | 101.6989(13)                                                     |
| Volume(Å <sup>3</sup> )         | 1180.99(5)                                                                                    | 1191.56(7)                                                       |
| Z                               | 2                                                                                             | 4                                                                |
| <i>R</i> , <i>wR</i> , <i>S</i> | 0.0249, 0.0992, 0.856                                                                         | 0.0230, 0.0795, 0.886                                            |
| Bond length (Å)                 | LTP                                                                                           | HTP                                                              |
| Cd1-O1                          | 2.397(6)                                                                                      | 2.4127(14)                                                       |
| Cd1-Cl4                         | 2.558(2)                                                                                      | 2.5617(5)                                                        |
| Cd1-Cl2'                        | 2.6253(13)                                                                                    | 2.6308(6)                                                        |
| Cd1-Cl2                         | 2.6305(16)                                                                                    | 2.6367(6)                                                        |
| Cd1-Cl3'                        | 2.6306(15)                                                                                    | 2.6397(6)                                                        |
| Cd1-Cl3                         | 2.6385(16)                                                                                    | 2.6397(6)                                                        |
| Cd1'-O1'                        | 2.408(6)                                                                                      | 2.4127(14)                                                       |
| Cd1'-Cl4'                       | 2.563(2)                                                                                      | 2.5617(5)                                                        |
| Cd1'-Cl3'                       | 2.6372(15)                                                                                    | 2.6397(6)                                                        |
| Cd1'-Cl3                        | 2.6422(16)                                                                                    | 2.6397(6)                                                        |
| Cd1'-Cl2                        | 2.6280(17)                                                                                    | 2.6307(5)                                                        |
| Cd1'-Cl2'                       | 2.6360(13)                                                                                    | 2.6367(6)                                                        |
| N1-C1                           | 1.516(9)                                                                                      | 1.504(2)                                                         |
| N1-C5                           | 1.513(8)                                                                                      | 1.508(2)                                                         |
| N1-C3                           | 1.501(10)                                                                                     | 1.507(2)                                                         |
| O1-C2                           | 1.474(8)                                                                                      | 1.427(2)                                                         |
| O2-C6                           | 1.396(6)                                                                                      | 1.407(3)                                                         |
| O3-C4                           | 1.399(7)                                                                                      | 1.421(3)                                                         |
| C1-C2                           | 1.490(10)                                                                                     | 1.505(3)                                                         |
| C3-C4                           | 1.555(8)                                                                                      | 1.510(3)                                                         |
| C5-C6                           | 1.479(10)                                                                                     | 1.513(3)                                                         |
| N1'-C1'                         | 1.491(8)                                                                                      | 1.504(2)                                                         |
| N1'-C5'                         | 1.508(8)                                                                                      | 1.508(2)                                                         |
| N1'-C3'                         | 1.517(9)                                                                                      | 1.507(2)                                                         |
| O1'-C2'                         | 1.384(9)                                                                                      | 1.427(2)                                                         |
| O2'-C6'                         | 1.451(7)                                                                                      | 1.407(3)                                                         |
| O3'-C4'                         | 1.353(7)                                                                                      | 1.421(3)                                                         |

|                |            |             |
|----------------|------------|-------------|
| C1'-C2'        | 1.526(10)  | 1.505(3)    |
| C3'-C4'        | 1.485(8)   | 1.510(3)    |
| C5'-C6'        | 1.543(9)   | 1.513(3)    |
| Bond angle (°) | LTP        | HTP         |
| O1-Cd1-Cl4     | 173.89(11) | 174.63(3)   |
| O1-Cd1-Cl2'    | 90.04(11)  | 89.72(4)    |
| O1-Cd1-Cl2     | 88.21(11)  | 87.69(4)    |
| O1-Cd1-Cl3'    | 77.65(12)  | 78.17(3)    |
| O1-Cd1-Cl3     | 88.28(11)  | 88.66(4)    |
| Cl4-Cd1-Cl2    | 95.14(7)   | 95.182(16)  |
| Cl4-Cd1-Cl2'   | 94.72(7)   | 94.516(16)  |
| Cl4-Cd1-Cl3    | 88.32(7)   | 88.431(17)  |
| Cl4-Cd1-Cl3'   | 97.52(7)   | 97.539(16)  |
| Cl2-Cd1-Cl2'   | 95.35(4)   | 95.500(17)  |
| Cl2-Cd1-Cl3'   | 84.95(5)   | 84.765(18)  |
| Cl2'-Cd1-Cl3'  | 167.68(8)  | 167.871(18) |
| Cl2'-Cd1-Cl3   | 85.11(5)   | 84.883(18)  |
| Cl2-Cd1-Cl3    | 176.46(8)  | 176.322(16) |
| Cl3-Cd1-Cl3'   | 93.85(5)   | 94.091(18)  |
| Cd1-Cl2'-Cd1'  | 94.70(5)   | 94.809(17)  |
| Cd1-Cl3-Cd1'   | 94.24(5)   | 94.527(18)  |
| O1'-Cd1'-Cl4'  | 175.54(11) | 174.63(3)   |
| O1'-Cd1'-Cl2'  | 87.53(11)  | 87.69(4)    |
| O1'-Cd1'-Cl2   | 89.47(12)  | 89.72(4)    |
| O1'-Cd1'-Cl3'  | 89.49(11)  | 88.66(4)    |
| O1'-Cd1'-Cl3   | 78.78(12)  | 78.17(3)    |
| Cl4'-Cd1'-Cl2  | 93.99(7)   | 94.516(16)  |
| Cl4'-Cd1'-Cl2' | 94.92(7)   | 95.182(16)  |
| Cl4'-Cd1'-Cl3  | 97.70(7)   | 97.539(16)  |
| Cl4'-Cd1'-Cl3' | 88.02(7)   | 88.431(17)  |
| Cl2-Cd1'-Cl2'  | 95.61(4)   | 95.500(17)  |
| Cl2-Cd1'-Cl3'  | 84.87(5)   | 84.883(18)  |
| Cl2'-Cd1'-Cl3' | 176.97(7)  | 176.322(16) |
| Cl2'-Cd1'-Cl3  | 84.83(5)   | 84.765(18)  |
| Cl2-Cd1'-Cl3   | 168.22(8)  | 167.871(18) |
| Cl3-Cd1'-Cl3'  | 94.09(5)   | 94.091(18)  |
| Cd1'-Cl2-Cd1   | 94.72(5)   | 94.809(17)  |
| Cd1'-Cl3'-Cd1  | 94.51(5)   | 94.527(18)  |
| C1-N1-C5       | 110.3(5)   | 110.45(13)  |
| C1-N1-C3       | 112.1(5)   | 112.31(13)  |
| C5-N1-C3       | 109.4(6)   | 110.66(14)  |
| C1'-N1'-C5'    | 111.1(4)   | 110.45(13)  |
| C1'-N1'-C3'    | 112.5(4)   | 112.31(13)  |

|              |          |            |
|--------------|----------|------------|
| C5'-N1'-C3'  | 111.6(6) | 110.66(14) |
| N1-C1-C2     | 113.9(5) | 114.34(14) |
| O1-C2-C1     | 109.7(5) | 110.79(14) |
| N1-C3-C4     | 110.9(6) | 114.84(16) |
| N1-C5-C6     | 116.3(5) | 115.07(14) |
| O2-C6-C5     | 108.5(6) | 108.45(18) |
| O3-C4-C3     | 110.7(5) | 109.32(16) |
| N1'-C1'-C2'  | 113.6(5) | 114.34(14) |
| O1'-C2'-C1'  | 111.3(5) | 110.79(14) |
| N1'-C3'-C4'  | 117.0(6) | 114.84(16) |
| N1'-C5'-C6'  | 114.7(5) | 115.07(14) |
| O2'-C6'-C5'  | 107.3(6) | 108.45(18) |
| O3'-C4'-C3'  | 109.5(5) | 109.32(16) |
| C2-O1-Cd1    | 123.2(4) | 124.52(10) |
| C2'-O1'-Cd1' | 125.3(4) | 124.52(10) |

Table S2. Point charge model analysis of **TATC**. According to the crystal structure data collected at 213 K (LTP). We assume positive charge center influenced by the Cd<sup>II</sup> and protonated N while negative charge center influenced by Cl<sup>-</sup> from their equilibrium position within the unit cell.

| Atoms            | Equivalent Crystal Coordination |             |               | Center Coordination     |
|------------------|---------------------------------|-------------|---------------|-------------------------|
| N <sup>+</sup>   | (0.7219(6)                      | 0.9160(4)   | 0.9162(8))    | (0.5, 0.4674(4), 0.5)   |
|                  | (0.2781(6)                      | 0.4160(4)   | 0.0838(8))    |                         |
|                  | (0.7236(5)                      | 0.5188(4)   | 0.4138(6))    |                         |
|                  | (0.2764(5)                      | 0.0188(4)   | 0.5862(6))    |                         |
| Cd <sup>2+</sup> | (0.81868(5)                     | 0.22802(2)  | 0.96564(6))   | (0.5, 0.46751(2), 0.5)  |
|                  | (0.18132(5)                     | 0.72802(2)  | 0.03436(6))   |                         |
|                  | (0.81858(5)                     | 0.20700(2)  | 0.46551(5))   |                         |
|                  | (0.18142(5)                     | 0.70700(2)  | 0.53449(5))   |                         |
| Cl <sup>-</sup>  | (0.00840(15)                    | 0.23347(16) | 0.26595(19))  | (0.5, 0.46725(15), 0.5) |
|                  | (0.99160(15)                    | 0.73347(16) | 0.73405(19))  |                         |
|                  | (0.00806(15)                    | 0.19993(15) | 0.766789(17)) |                         |
|                  | (0.99194(15)                    | 0.69993(15) | 0.23322(17))  |                         |
|                  | (0.62620(16)                    | 0.22205(15) | 0.1681(2))    |                         |
|                  | (0.37380(16)                    | 0.72205(15) | 0.8319(2))    |                         |
|                  | (0.62522(17)                    | 0.21316(15) | 0.6689(2))    |                         |
|                  | (0.37478(17)                    | 0.71316(15) | 0.3311(2))    |                         |
|                  | (0.81294(18)                    | 0.38125(13) | 0.9153(2))    |                         |
|                  | (0.18706(18)                    | 0.88125(13) | 0.0847(2))    |                         |
|                  | (0.81203(19)                    | 0.05361(13) | 0.4130(2))    |                         |
|                  | (0.18797(19)                    | 0.55361(13) | 0.5870(2))    |                         |

$$P_s = [(e \times 0.4674) \times 4 + (e \times 0.46751) \times 8 - (e \times 0.467245) \times 12] \times b / V$$

$$= 0.06 \mu\text{C}/\text{cm}^2$$

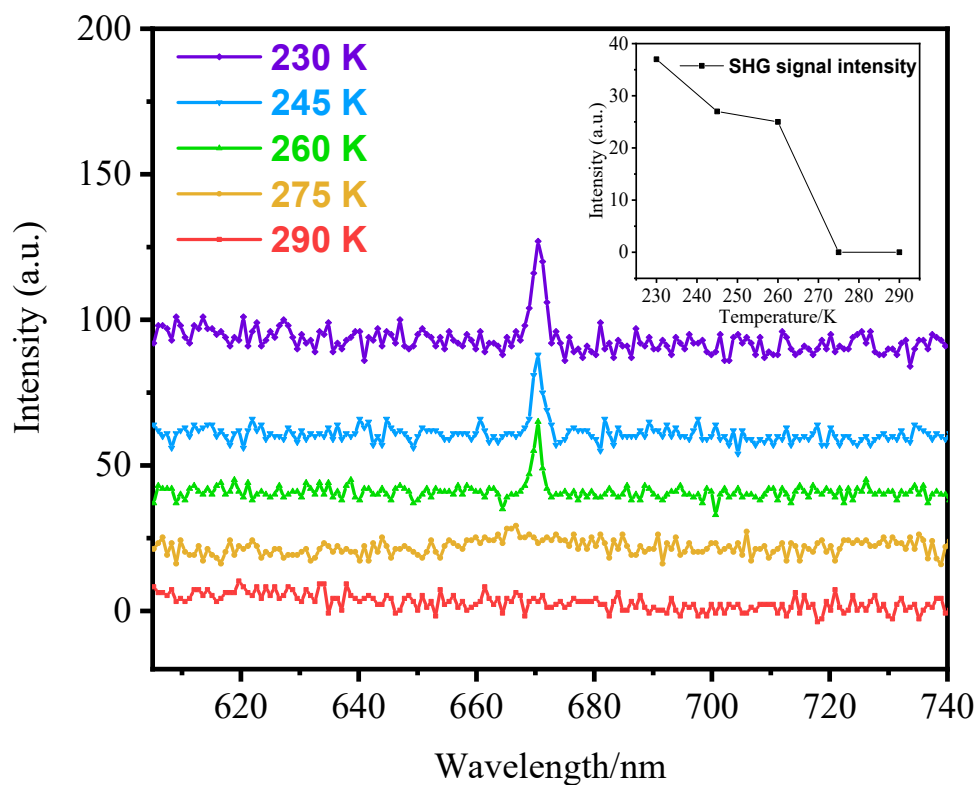

Figure S3. The second harmonic generation (SHG) measurements at several temperatures. The inset picture shows the variation of signal intensity with increasing of the temperature.

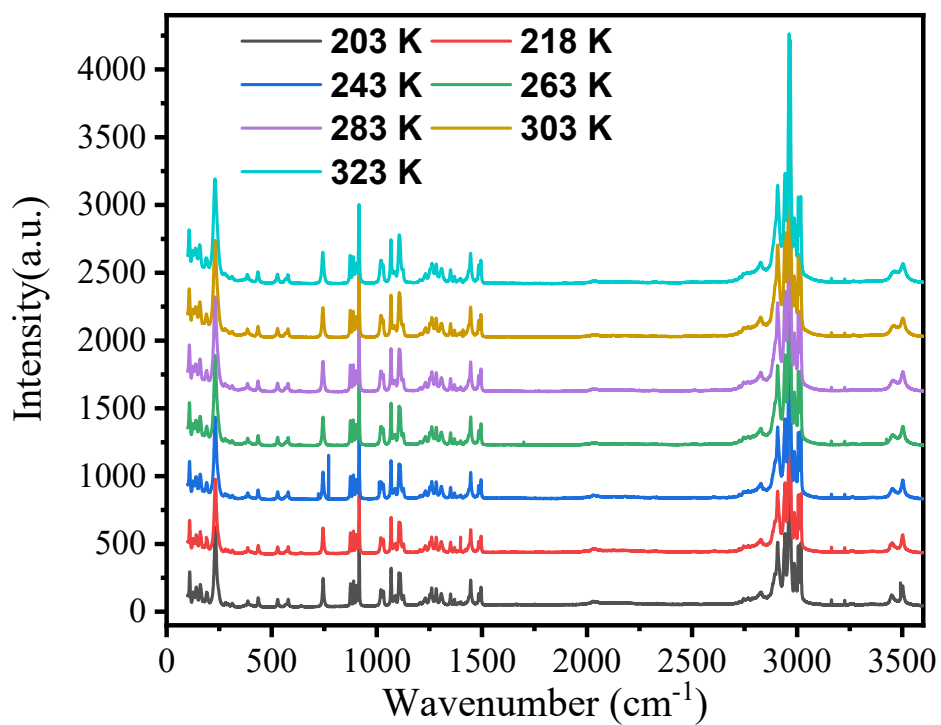

Figure S4. Raman spectra of TATC.

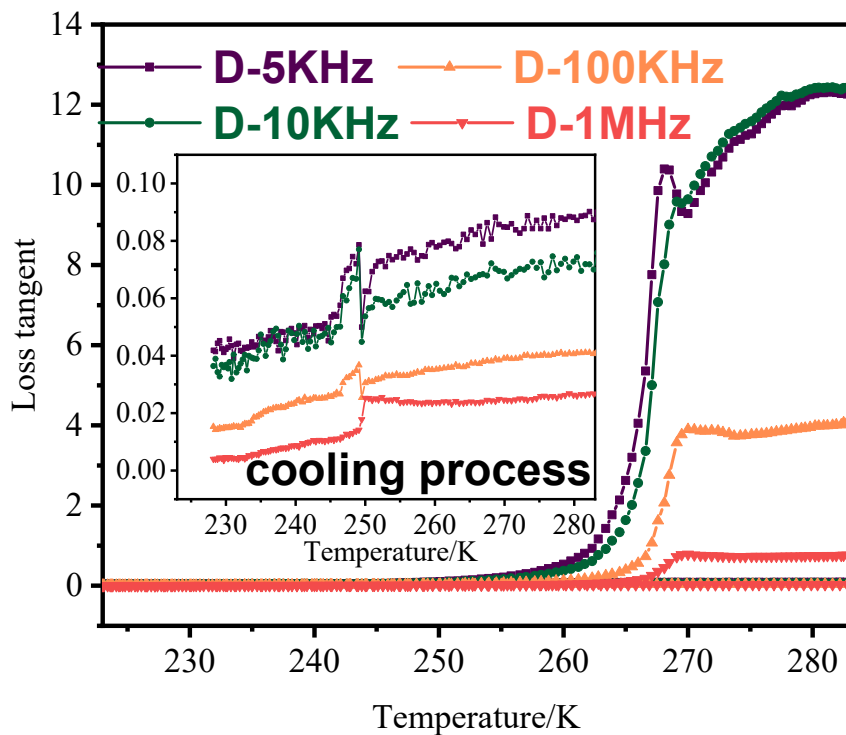

Figure S5. Temperature-dependence of the loss tangent of TATC measured in a heating and cooling cycle.
